# Supplementary material for: The clonal evolution of two distinct T315I-positive BCR-ABL1 subclones in a Philadelphia-positive acute lymphoblastic leukemia failing multiple lines of therapy: a case report
Source: Springer Nature journal article supplement (doi:10.1186/s12885-017-3511-2), 2017-08-05
Supplement: MOESM1 [file 13351980]

| Sample | Date       | TKI/Treatment                                                                                              | BCR-ABL1/ABL1% | Mutations by SS                              | Mutations by DS                                                                                                          | Compound                                                        |
|--------|------------|------------------------------------------------------------------------------------------------------------|----------------|----------------------------------------------|--------------------------------------------------------------------------------------------------------------------------|-----------------------------------------------------------------|
| ALL-1  | 26/06/2013 | DIAGNOSIS                                                                                                  | 111,09         | WT                                           | WT                                                                                                                       |                                                                 |
| ALL-2  | 02/09/2013 | DASATINIB<br>at140 mg/daily<br>(day 52)                                                                    | 1.22           | WT                                           | T315I (act>att) 0.56%<br>T315I (act>atc) 1.44%                                                                           |                                                                 |
| ALL-3  | 25/09/2013 | DASATINIB<br>at140 mg/daily<br>(day 85)                                                                    | 39.15          | T315I (act>att) ~60%                         | T315I (act>att) 82.17%<br>T315I (act>atc) 15.49%                                                                         |                                                                 |
| ALL-4  | 18/10/2013 | POST – CHEMO<br>Clofarabine<br>(80 mg/daily. for 5 days)<br>Cyclophosphamide<br>(800 mg/daily. for 5 days) | 1.69           | T315I (act>att) 100%                         | T315I (act>att) 100%                                                                                                     |                                                                 |
| ALL-5  | 30/10/2013 | BLINATUMOMAB<br>(CD19 antibody)                                                                            | 0.03           | WT                                           | WT                                                                                                                       |                                                                 |
| ALL-6  | 11/12/2013 | POST 1st COURSE<br>BLINATUMOMAB                                                                            | 0.008          | WT                                           | WT                                                                                                                       |                                                                 |
| ALL-7  | 14/01/2014 | 2nd COURSE<br>BLINATUMOMAB                                                                                 | 116.82         | T315I (act>att) ~60%                         | T315I (act>att) 79.91%<br>T315I (act>atc) 7.06%                                                                          |                                                                 |
| ALL-8  | 05/02/2014 | PONATINIB<br>45 mg/daily<br>(day 21)                                                                       | 7.93           | T315?                                        | T315I (act>att) 58%<br>T315I (act>atc) 47.14%                                                                            |                                                                 |
| ALL-9  | 16/04/2014 | TRANSPLANT<br>(day 30)                                                                                     | 0.48           | WT                                           | T315I (act>att) 1.27%<br>T315I (act>atc) 0.77%                                                                           |                                                                 |
| ALL-10 | 03/06/2014 | TRANSPLANT<br>(day 76)                                                                                     | 65.3           | T315I (act>att) ~80%<br>F359V (ttc>gtc) ~20% | T315I (act>att) 44%<br>T315I (act>atc) 9.16%<br>F359V (ttc>gtc) 16.34%<br>H396R (cat>cgt) 9.47%                          | T315I (act>att) + F359V 16.34%<br>T315I (act>att) + H396R 9.47% |
| ALL-11 | 29/07/2014 | CYTOREDUCTIVE<br>CHEMOTHERAPY                                                                              | 87.7           | T315?<br>Y253H (tac>cac) ~20%                | T315I (act>att) 17.93%<br>T315I (act>atc) 67%<br>Y253H (tac>cac) 5.05%<br>F359V (ttc>gtc) 3.17%<br>H396R (cat>cgt) 0.73% | T315I (act>atc) + Y253H 3.98%<br>T315I (act>att)+ F359V 0.67%   |
